# Supplementary material for: Staying in Touch
Source: publisher site journal article supplement (doi:10.3762/bjnano.5.56), 1995-12-01
Supplement: Additional file 1 [file 2190-4286-5-56-S1.pdf]

# Supporting Information

for

## Encapsulation of nanoparticles into single-crystal ZnO nanorods and microrods

Jinzhang Liu\*, Marco Notarianni, Llew Rintoul and Nunzio Motta

Address: Institute for Future Environments and School of Chemistry, Physics, and Mechanical Engineering, Queensland University of Technology, Brisbane, 4001, QLD, Australia

Email: Jinzhang Liu\* - jinzhang.liu@qut.edu.au

\*Corresponding author

### Additional figures

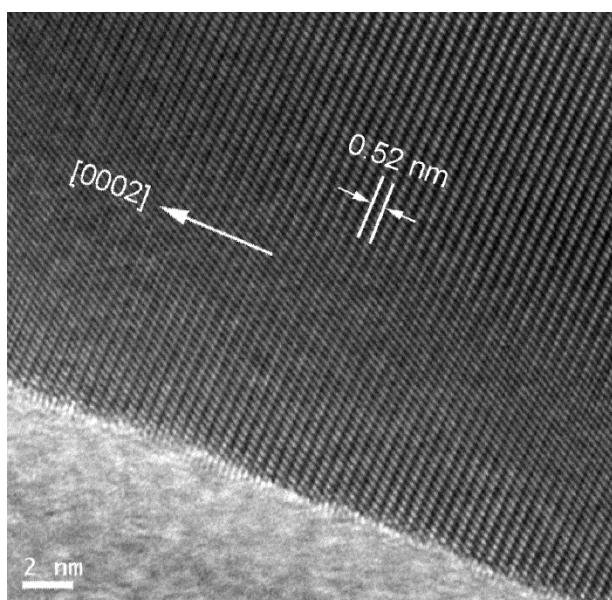

**Figure S1:** High resolution transmission electron microscopy image of a ZnO nanorod grown by the aqueous solution method, showing the single crystal feature and growth direction along [0001].

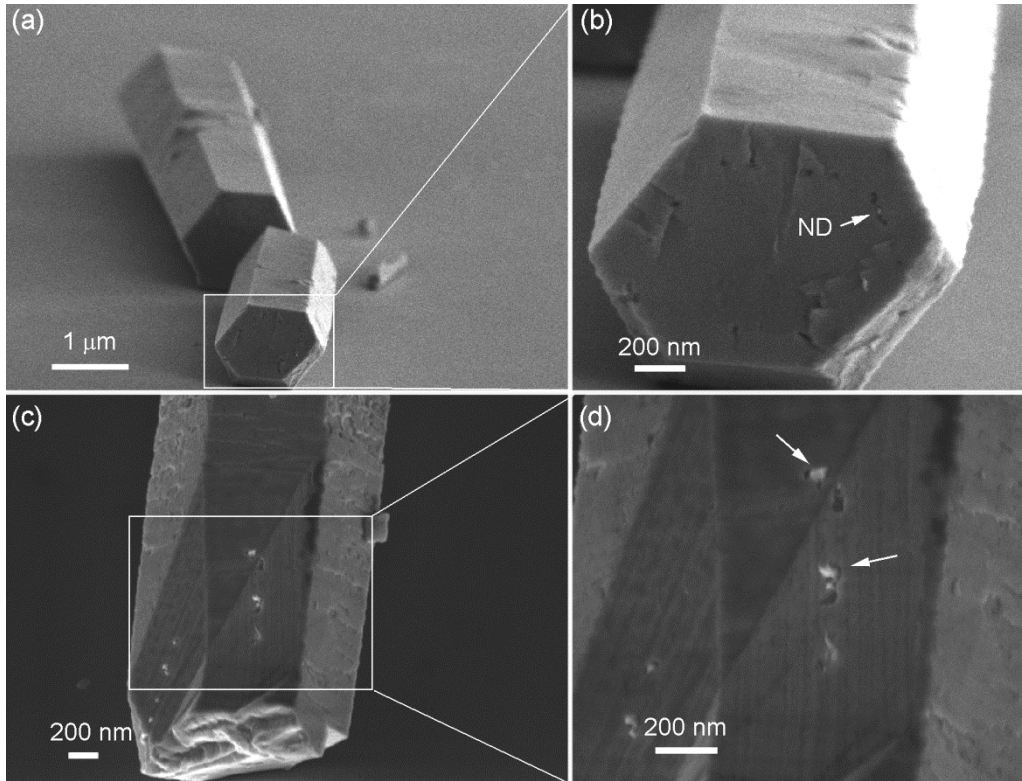

**Figure S2:** FE-SEM images of fractured ZnO microrods lying on Si substrate. (a) Tilted-view image. (b) A close view image of the cross-section, revealing tiny cavities and an exposed ND. (c) Top-view image of a ZnO microrod with NDs in the fractured section. (d) A close view for exposed NDs.
